# Supplementary material for: Genome and Transcriptome Adaptation Accompanying Emergence of the Definitive Type 2 Host-Restricted Salmonella enterica Serovar Typhimurium Pathovar
Source: PubMed Central journal article supplement (PMC3760250; doi:10.1128/mbio.00565-13), 2013-08-27

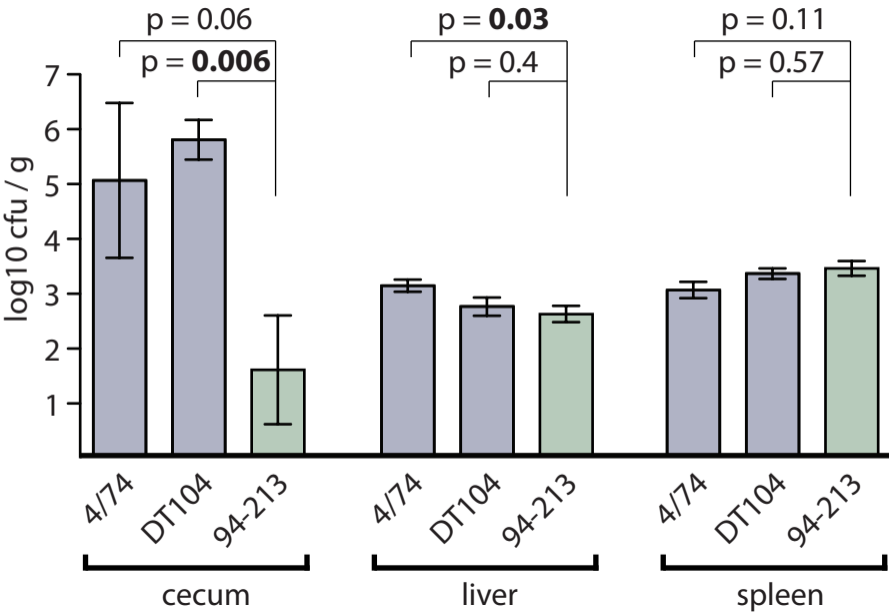

Supplement: mbo004131612sf01.pdf [file mbo004131612sf01.pdf]
